# Supplementary material for: Cancer stem-like sphere cells induced from de-differentiated hepatocellular carcinoma-derived cell lines possess the resistance to anti-cancer drugs
Source: PubMed Central journal article supplement (PMC4190290; doi:10.1186/1471-2407-14-722), 2014-09-27
Supplement: 12885_2014_4908_MOESM2_ESM.pdf [file 12885_2014_4908_MOESM2_ESM.pdf]

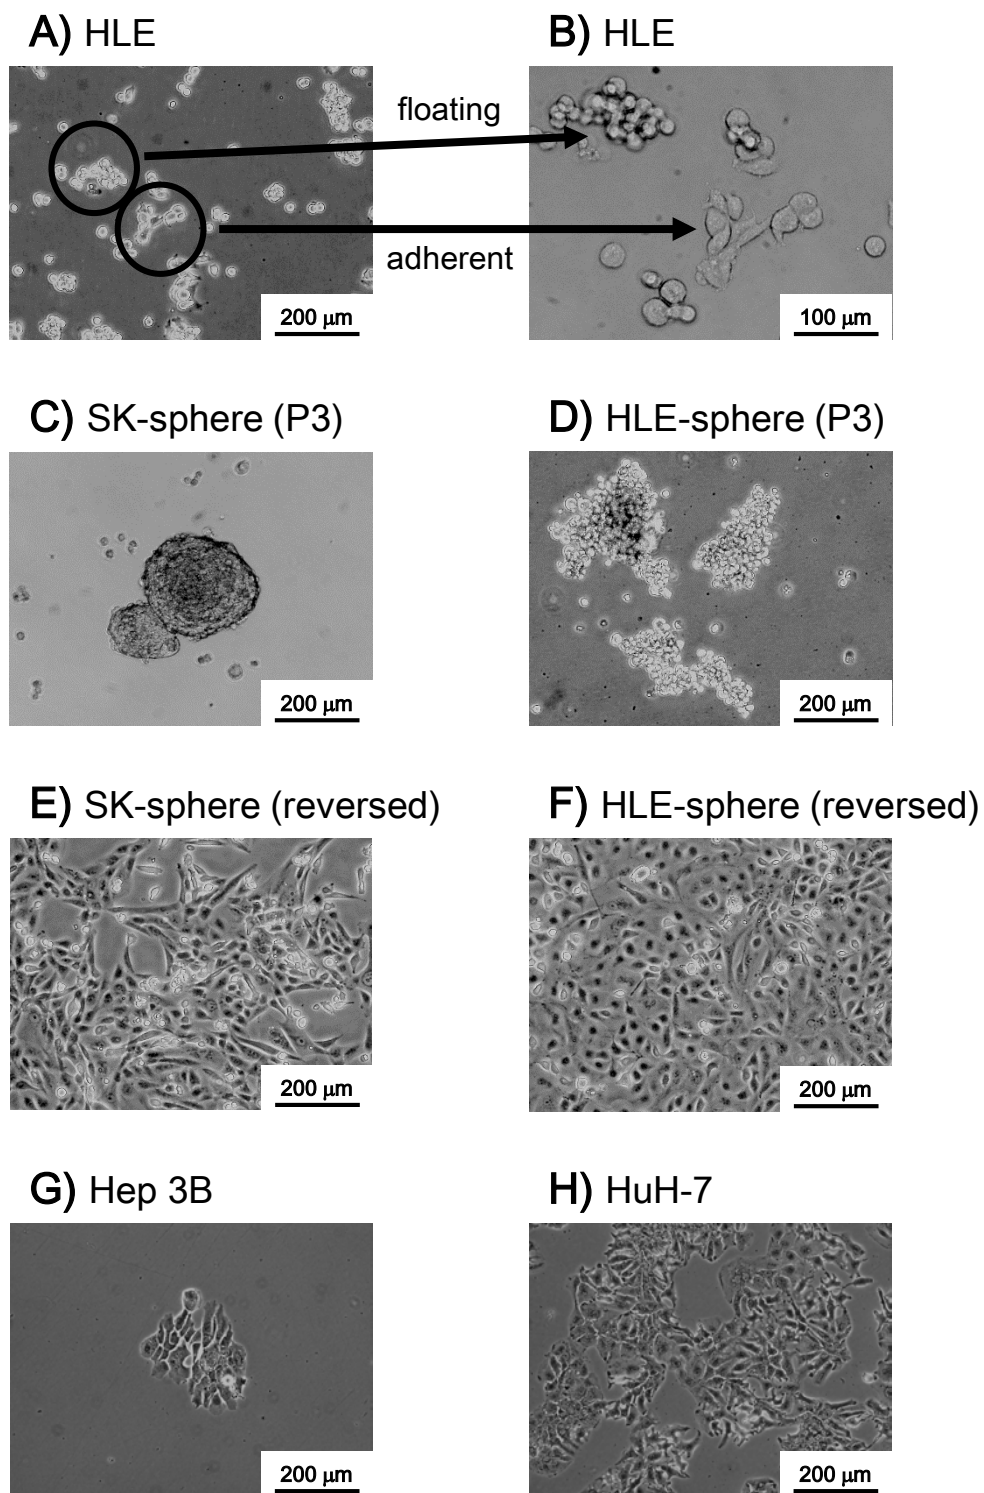

**Supplemental Figure S1** Sphere induction from HCC cell lines. *A* and *B*, HLE cells cultivated in the sphere induction medium for 4 days. There was floating sphere cells and adherent cells. Dissociated SK-sphere and HLE-sphere cells were re-cultivated in the induction medium for 7 days (*C* and *D*, photographs of passage 3) and normal medium containing FBS (*E* and *F*). Hep 3B (*G*) and HuH-7 (*H*) cells in the same sphere induction medium, but there was no spheroids nor floating cells.
